# Supplementary material for: E-seed skin: a carbohydrate–protein hybrid nanostructure for delayed germination and accelerated growth
Source: Royal Society of Chemistry journal article supplement (doi:10.1039/d4tb01603c), 2025-01-01
Supplement: d4tb01603c1.pdf [file d4tb01603c1.pdf]

## Supporting Information

# **E-seed skin: Carbohydrate-protein hybrid nanostructure for delayed germination and accelerated growth**

Parul Sharma,<sup>a</sup> Bandana Kumari Sahu,<sup>a</sup> Kanchan Swami,<sup>a</sup> Mahima Chandel,<sup>a</sup> Prem Kumar,<sup>a</sup>  
Thanikaivelan Palanisamy,<sup>\*b</sup> and VijayaKumar Shanmugam<sup>\*a</sup>

\* Corresponding authors:

\*E-mail addresses: vijayakumarshanmugam@gmail.com

<sup>a</sup>Chemical Biology Unit, Institute of Nano Science and Technology, Knowledge City, Sahibzada  
Ajit Singh Nagar, Sector- 81, Punjab - 140306, India

<sup>b</sup>Advanced Materials Laboratory, Council of Scientific and Industrial Research (CSIR)-Central  
Leather Research Institute (CLRI), Adyar, Chennai 600020, Tamil Nadu, India

\*E-mail: thanik@clri.res.in

### **Table of Contents**

- **SEM imaging of PVA/Pec/Zn-NF, average diameter distribution of nanofibers, and EDAX mapping.....S2**
- **Characterization of collagen nanoparticles using SEM, and corresponding average diameter of nanoparticles.....S3**
- **AFM images and FTIR spectra.....S4**
- **XPS survey and core level spectra.....S5**
- **Crystallinity index analysis, stress-strain curve.....S6**
- **Water contact angle measurements.....S7**
- **Surface profilometry.....S8**
- **Cross-sectional SEM images of uncoated and PVA/Pec/Zn/Col-NF coated seeds...S9**
- **Fungal assay.....S10**

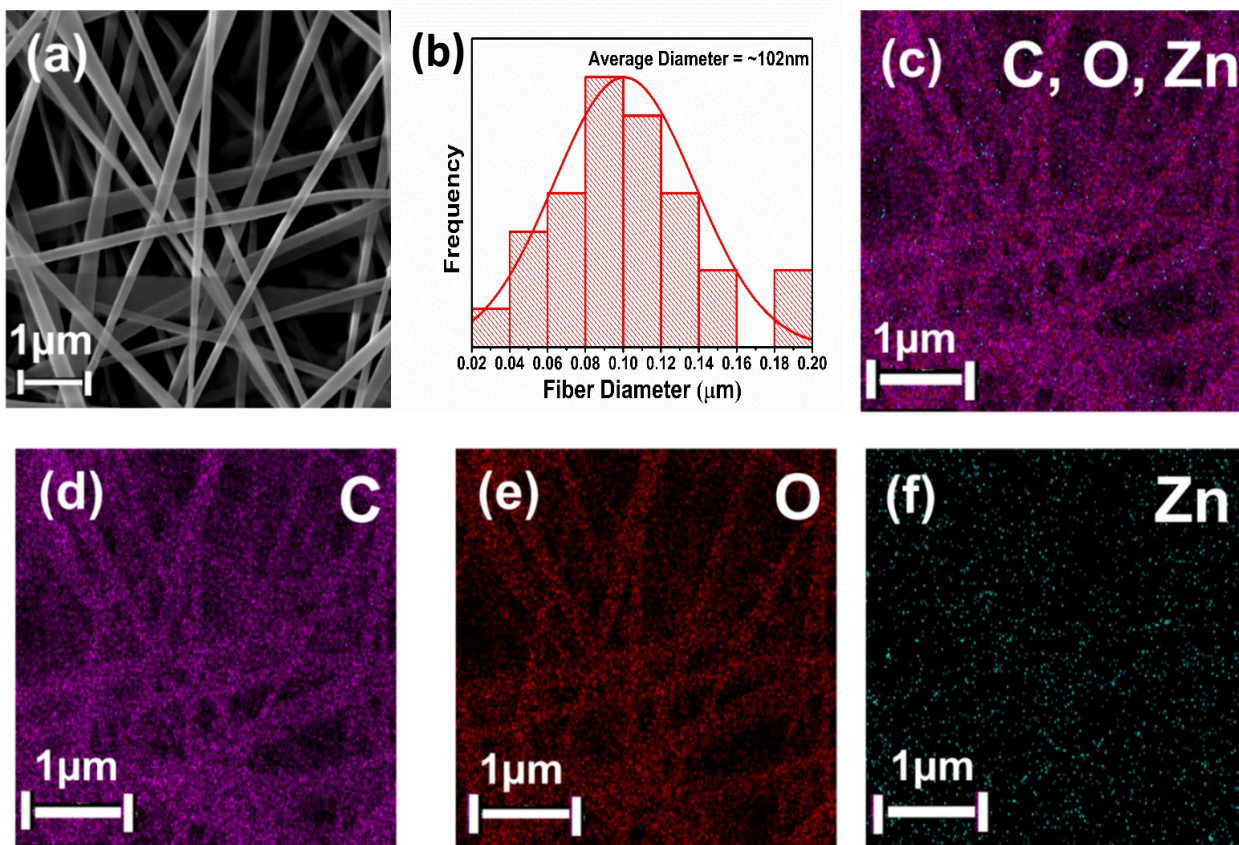

**Figure S1.** (a) SEM image of the morphology of PVA/Pec/Zn nanofibers; (b) Average fiber diameter distribution graph of PVA/Pec/Zn-NF for  $n=50$  and (c-f) corresponding EDAX mapping showing elemental composition.

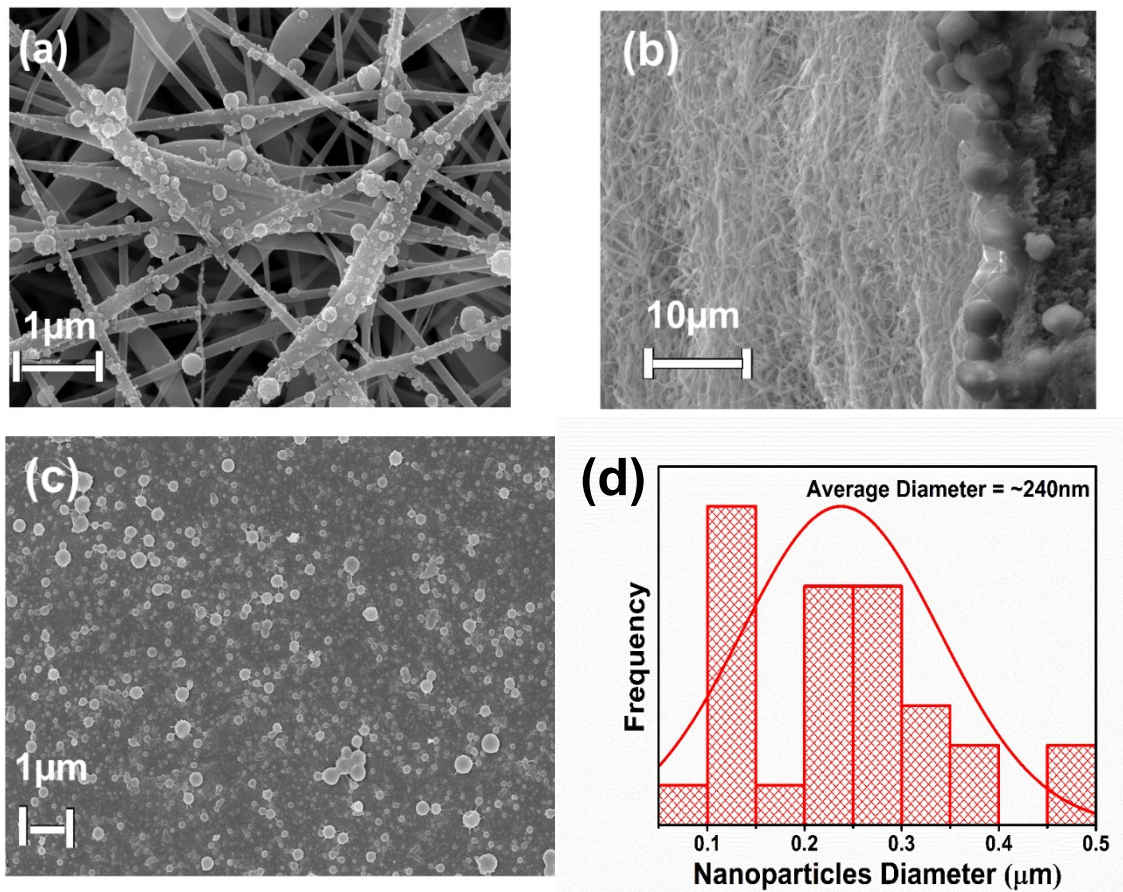

**Figure S2.** SEM images of (a) collagen electrospun for 30 minutes over PVA/Pec/Zn-NF; (b) cross-section of 6 hours collagen electrospun over PVA/Pec/Zn-NF (c) SEM image of electrospun collagen nanoparticles and (d) Average nanoparticles diameter distribution graph for n=50.



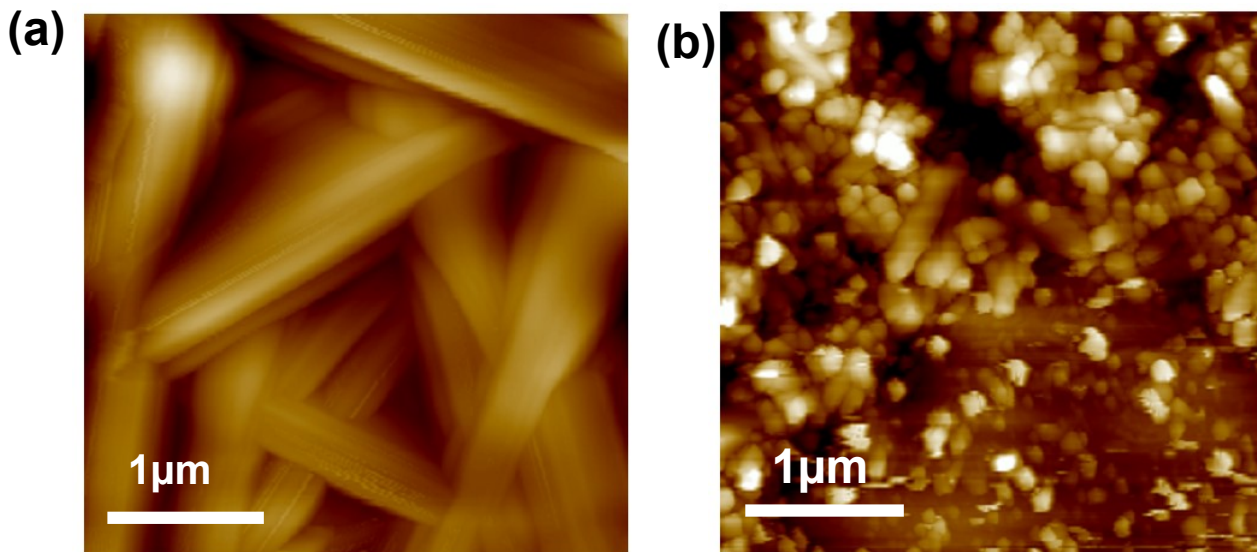

**Figure S3.** AFM image of (a) PVA/Pec/Zn-NF and (b) PVA/Pec/Zn/Col-NF after 6 h of electrospaying.

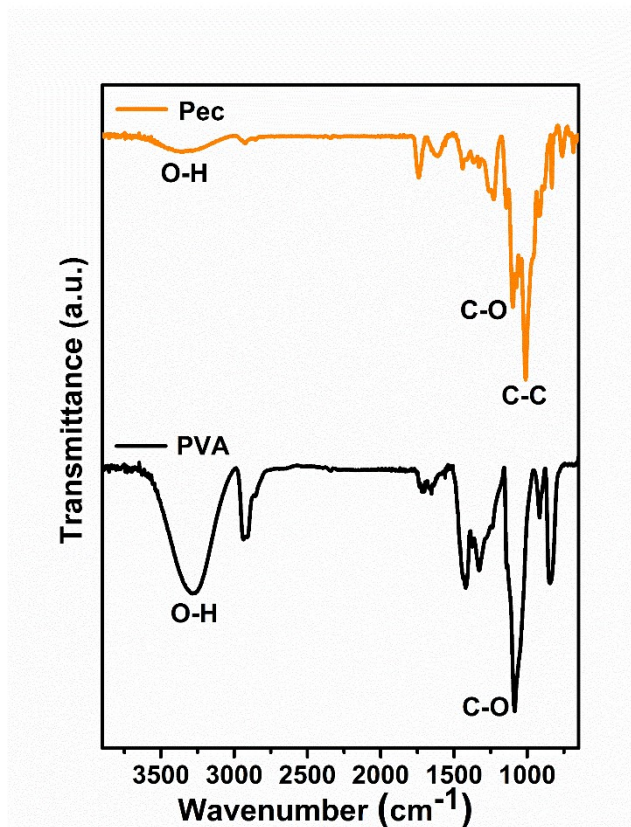

**Figure S4.** FTIR spectra of PVA and pectin.

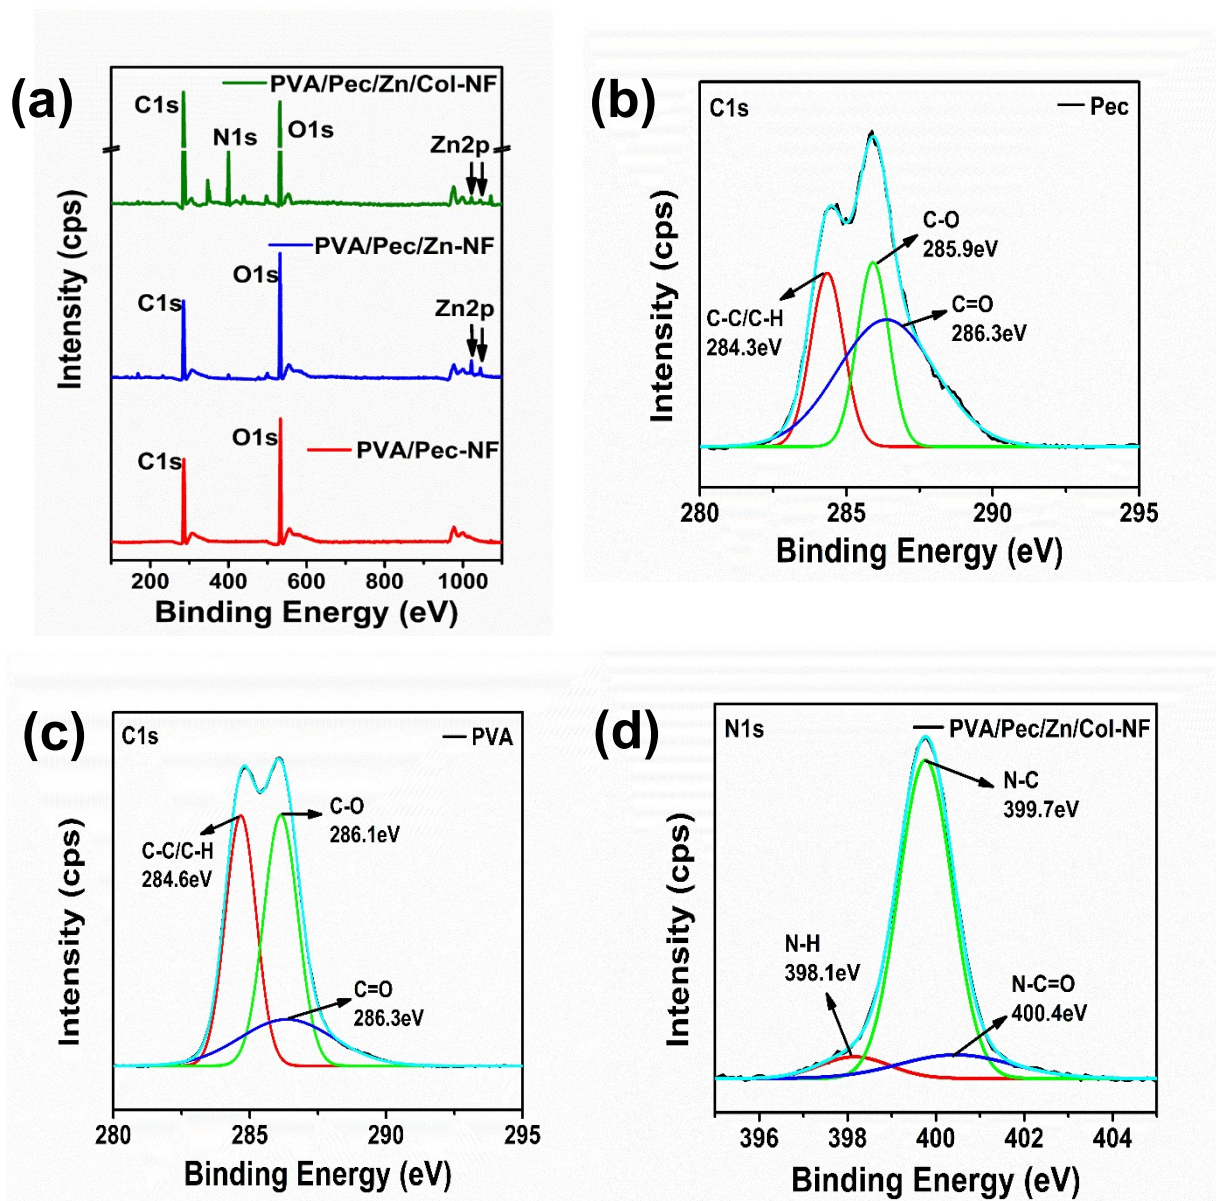

**Figure S5.** (a) XPS survey spectra of PVA/Pec/Zn/Col-NF, PVA/Pec/Zn-NF, and PVA/Pec-NF, (b) C1s XPS spectrum of pectin, (c) C1s XPS spectrum of PVA, and (d) N1s XPS spectrum of PVA/Pec/Zn/Col-NF.



**Table S1.** Percentage of crystallinity index of PVA-NF, PVA/Pec-NF, PVA/Pec/Zn-NF, and PVA/Pec/Zn/Col-NF.

| Nanofiber Samples | Crystallinity Index (%) |
|-------------------|-------------------------|
| PVA-NF            | 45                      |
| PVA/Pec-NF        | 39                      |
| PVA/Pec/Zn-NF     | 36                      |
| PVA/Pec/Zn/Col-NF | 30                      |

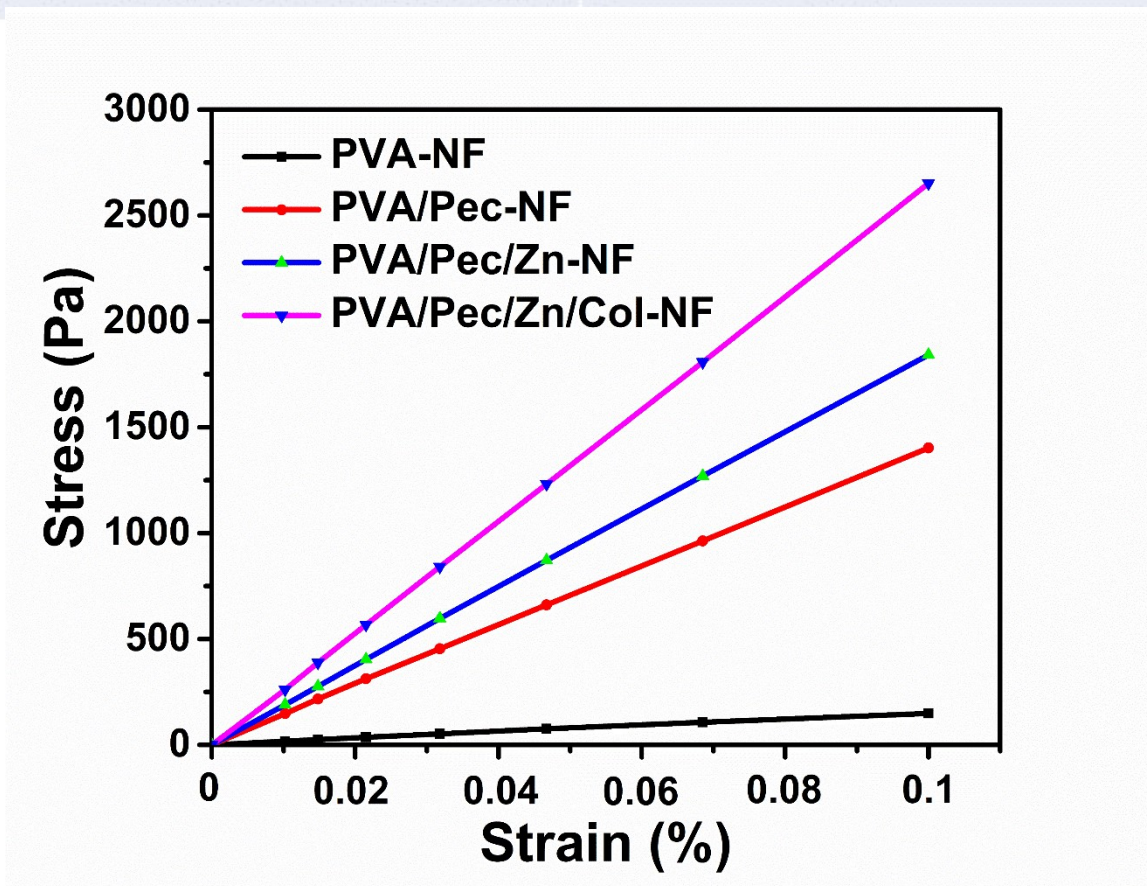

**Figure S6.** Stress-strain curves of PVA-NF, PVA/Pec-NF, PVA/Pec/Zn-NF, and PVA/Pec/Zn/Col-NF.

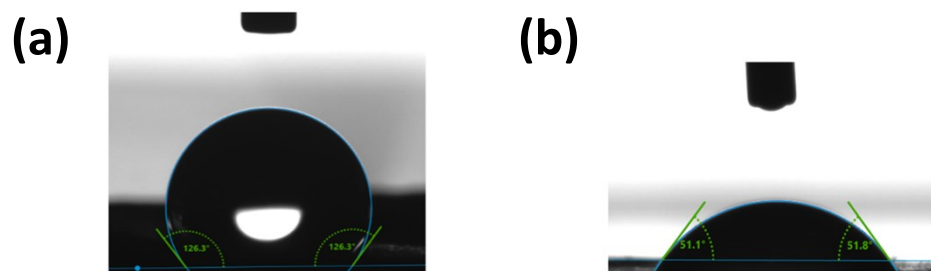

**Figure S7.** Images showing static water contact angles of (a) PVA/Pec/Zn/CoI-NF, and (b) PVA/Pec/Zn-NF.

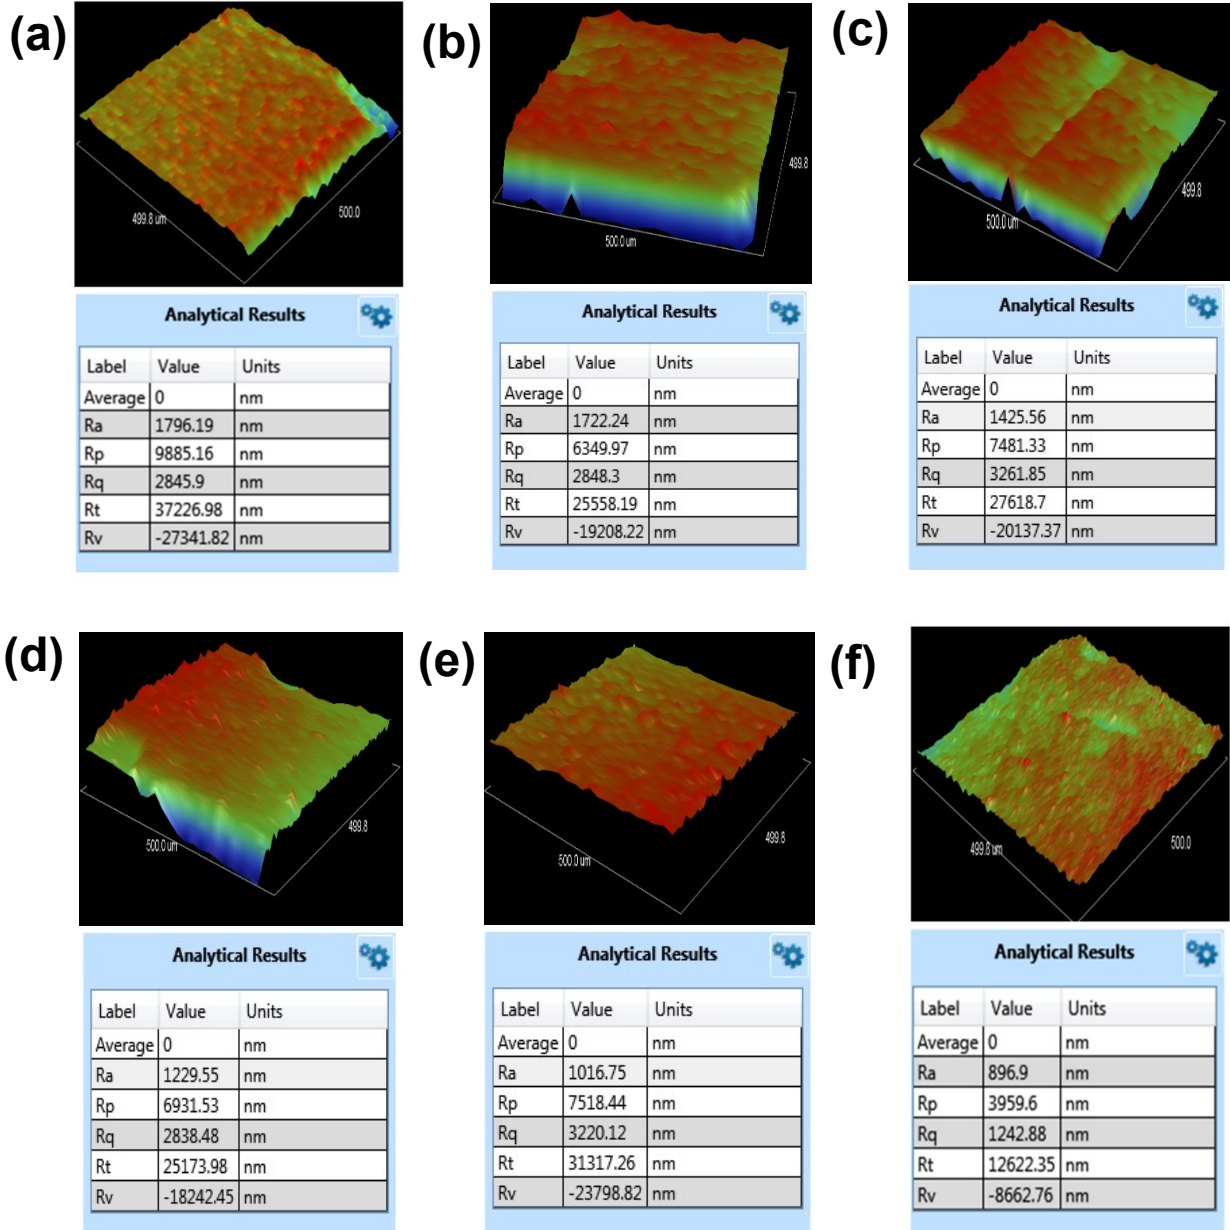

**Figure S8.** Surface roughness images of PVA/Pec/Zn-NF (a) before and (b-f) after collagen electrospinning of 0.5, 1, 1.5, 3, 6h, respectively captured using surface profilometer.



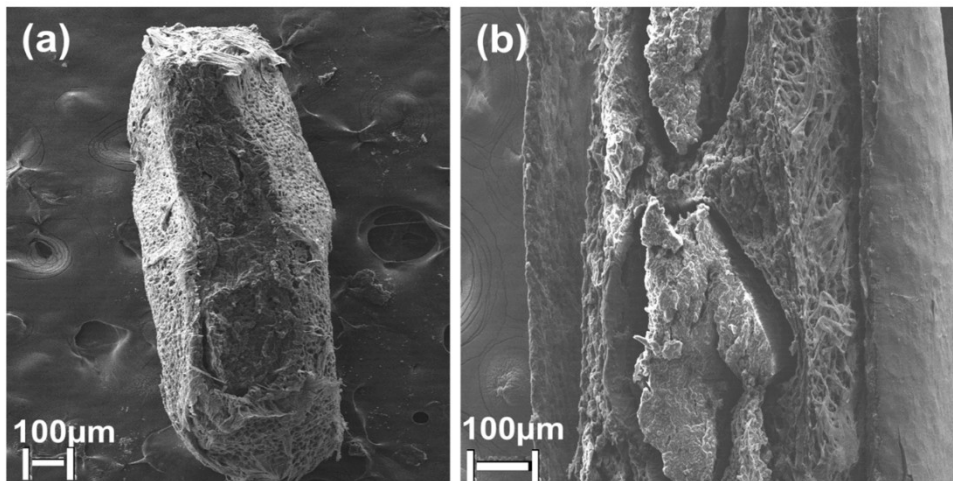

**Figure S9.** SEM image of the cross-sectional morphology of (a) uncoated and (b) PVA/Pec/Zn/Col-NF coated seed.

**(a) Uncoated**

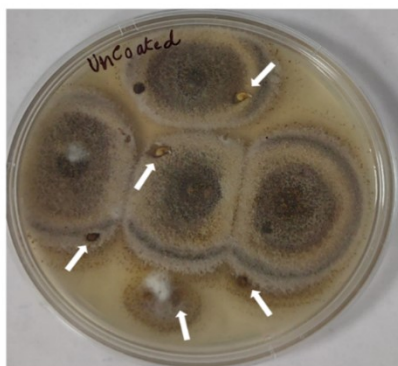

**(b) PVA/Pec-NF**

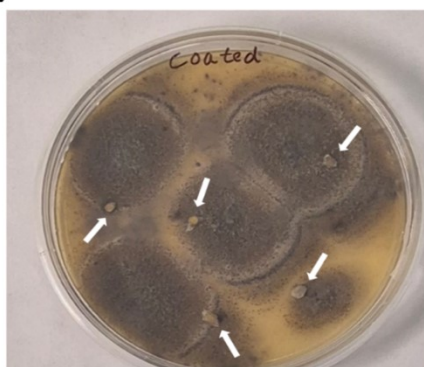

**(c) PVA/Pec/Zn-NF**

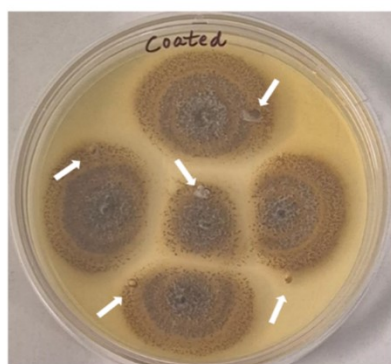

**(d) PVA/Pec/Zn/Col-NF**

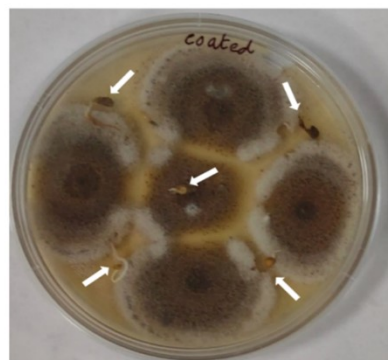

**Figure S10.** Images showing *Colletotrichum* fungal mat on potato dextrose agar plates along with (a) uncoated, (b) PVA/Pec-NF, (c) PVA/Pec/Zn-NF (control experiments), and (d) PVA/Pec/Zn/Col-NF (treatment) coated seeds for assessing seed germination efficiency under biotic stress. White arrows represent the position of seeds.
